# Supplementary material for: Registration of surgical adverse outcomes: a reliability study in a university hospital
Source: PubMed Central journal article supplement — BMJ Open. 2012 May 25;2(3):e000891. doi: 10.1136/bmjopen-2012-000891 (PMC3367156; doi:10.1136/bmjopen-2012-000891), 2012-05-25
Supplement: bmjopen-2012-000891.draft_revisions.pdf [file bmjopen-2012-000891.draft_revisions.pdf]

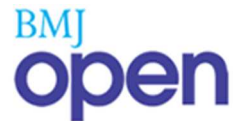

**Registration Of Surgical Adverse Events: As Reliable As Its Underlying Resources. A Reliability Study**

|                                 |                                                                                                                                                                                                                                                                                                                                                |
|---------------------------------|------------------------------------------------------------------------------------------------------------------------------------------------------------------------------------------------------------------------------------------------------------------------------------------------------------------------------------------------|
| Journal:                        | <i>BMJ Open</i>                                                                                                                                                                                                                                                                                                                                |
| Manuscript ID:                  | bmjopen-2012-000891                                                                                                                                                                                                                                                                                                                            |
| Article Type:                   | Research                                                                                                                                                                                                                                                                                                                                       |
| Date Submitted by the Author:   | 18-Jan-2012                                                                                                                                                                                                                                                                                                                                    |
| Complete List of Authors:       | Ubbink, Dirk; Academic Medical Center, Quality Assurance & Process Innovation<br>Visser, Annelies; Academic Medical Center Amsterdam, Department of Surgery<br>Gouma, Dirk; Academic Medical Center, University of Amsterdam, Department of Surgery<br>Goslings, J.C.; Academic Medical Center, University of Amsterdam, Department of Surgery |
| <b>Primary Subject Heading</b>: | Surgery                                                                                                                                                                                                                                                                                                                                        |
| Secondary Subject Heading:      | Surgery                                                                                                                                                                                                                                                                                                                                        |
| Keywords:                       | SURGERY, HEALTH SERVICES ADMINISTRATION & MANAGEMENT, Quality in health care < HEALTH SERVICES ADMINISTRATION & MANAGEMENT, Health & safety < HEALTH SERVICES ADMINISTRATION & MANAGEMENT, Clinical audit < HEALTH SERVICES ADMINISTRATION & MANAGEMENT                                                                                        |
|                                 |                                                                                                                                                                                                                                                                                                                                                |

SCHOLARONE™  
Manuscripts

Only

# Registration of surgical adverse events: As reliable as its underlying resources. A reliability study

Dirk T. Ubbink<sup>1, 2</sup>, Annelies Visser<sup>1</sup>, Dirk J. Gouma<sup>1</sup>, J. Carel Goslings<sup>1</sup>.

Departments of <sup>1</sup>Surgery and <sup>2</sup>Quality Assurance & Process Innovation

Academic Medical Center, University of Amsterdam, Amsterdam, The Netherlands.

**Keywords:** adverse outcome, surgical procedures, registry, medical dossier, hand-offs.

**Short title:** What are the best resources for registration of surgical adverse events?

**Word count:** 2374

**Corresponding author:**

Dr. D. T. Ubbink

Academic Medical Center

Department of Quality Assurance & Process Innovation

Meibergdreef 9

1105 AZ Amsterdam

The Netherlands

Telephone: +31 205666892

E-mail: [d.ubbink@amc.nl](mailto:d.ubbink@amc.nl)

**ARTICLE SUMMARY****Article focus:**

- How complete is the national surgical complication registry as applied in a university hospital?
- Should we use more or other resources for this purpose?

**Key messages:**

- Surgical complication registration largely depends on the reliability of the underlying resources.
- Better hand-off and additional consultation of the patient's dossier will increase the reliability.
- This extra effort can help avoid "mild" adverse events patients perceive as important and undesirable.

**Strengths and limitations:**

- Representative data set from a consistently used registry.
- Only in-hospital complications were taken into account.

**ABSTRACT**

**Objective:** Accurate registration of adverse surgical events is essential to detect areas for improvement of surgical care quality. One reason for inaccurate adverse event registration may be the method to collect these outcomes. We compared the completeness of the national complication registry database (LHCR) as used in our hospital with relevant information from other available resources.

**Design:** Retrospective reliability analysis.

**Setting:** University hospital.

**Participants:** From the 3252 patients admitted to the surgical wards in 2010 we randomly selected a cohort of 180 cases, oversampling those with adverse events. The LHCR contains adverse outcomes as reported during morning hand-offs or in discharge letters. We checked whether the number and severity of adverse outcomes recorded in the LHCR agreed with those reported in morning hand-offs, discharge letters, and medical and nursing files.

**Results:** In 135 out of 180 patients all resources could be retrieved completely. Fourteen percent of the patients with adverse events were not recorded in the LHCR. Missing adverse events were all reversible without the need for (re)operation, e.g., postoperative pain, delirium, or urinary tract complications. Only 38% of these adverse events were reported in the morning hand-offs and discharge letters, but were best reported in the medical and nursing files.

**Conclusions:** Surgical complication registration appears largely depending on the reliability of the underlying sources. For a more complete adverse outcome registration we advocate a better hand-off and additional consultation of the patient's dossier. This extra effort allows for improvement actions to eventually avoid "mild" adverse events patients perceive as important and undesirable.

## BACKGROUND

Of the patients admitted to a clinical department of surgery, approximately 10% is at risk of suffering a treatment-related complication and for some extensive gastrointestinal procedures even up to 50%.[1] A substantial part of these complications is preventable and thus epitomizes suboptimal care.[2] Accurate and routine registration of these adverse events is an important starting point from which to take action,[3-5] in order to reduce or even prevent these events and lower hospital mortality due to diminishing flaws in the care system.[6] Hence, professional societies and governmental institutions have urged to accurately record postoperative complications and to use this as a quality indicator. In the Netherlands, the Dutch Society of Surgeons already introduced a national surgical complication registry (LHCR) for this purpose in 2003.[7, 8]

However, information is needed on the performance of hospitals' adverse-event reporting systems.[9] Inaccurate registration and thus underreporting of complications or adverse events, as shown in previous studies,[10, 11] seems to be rewarded with an erroneously high score for quality of care. Part of the explanation might be a reluctance or negligence among doctors to report adverse events. Particularly strong disincentives for reporting are shame, fear of liability, loss of reputation, and peer disapproval.[12] The awareness that medical errors – but also surgical complications – are frequently system errors rather than an individual liability has helped abandoning a shame-and-blame culture and has harnessed the medical professional to report errors and complications.[13] Furthermore, increasing societal demands as to safety and transparency in healthcare have created more awareness of the importance of, and willingness to contribute to, and a better quality of care.[14, 15]

1  
2  
3 Another reason for an inaccurate complication registration could be the method  
4  
5 chosen to collect and record these adverse events. The events entered into the registration  
6  
7 database may be as complete as the resources from which these events are drawn. These  
8  
9 resources can be daily verbal hand-offs, regular (multidisciplinary) meetings, medical and  
10  
11 nursing dossiers, or the discharge letter. A previous comparison between daily reported  
12  
13 adverse events with those documented in medical dossiers showed considerable  
14  
15 discrepancy.[11] Hence, even a uniform, structural complication registration may have flaws  
16  
17 to be improved. However, the effort to achieve a (nearly) complete registration should be  
18  
19 weighed against its surplus value.  
20  
21  
22  
23

24 The aim of this study was to assess the accuracy of the postoperative complication  
25  
26 registration database we are using routinely and a comparison with the source documents in  
27  
28 order to detect areas for improvement of the complication registration in clinical surgical  
29  
30 care.  
31  
32  
33  
34  
35

## 36 **METHODS**

### 37 **Patients**

38  
39 This survey was undertaken in the Department of Surgery of a tertiary referral university  
40  
41 hospital in Amsterdam. From the admissions to any of the surgical wards during the year  
42  
43 2010, we randomly selected a sample of 180 patients (5.5%) from the LHCR database, while  
44  
45 ensuring that at least half of the patients had suffered at least one postoperative adverse  
46  
47 event according to the LHCR information. Thus, we ensured a sufficient number of  
48  
49 admissions with adverse events to analyse. Patients admitted more than once during that  
50  
51 year were included only once. We excluded patients whose resources could not be retrieved  
52  
53  
54  
55  
56  
57  
58  
59  
60

1  
2  
3 completely. The resulting sample was considered valid, because we compared the various  
4  
5 resources rather than the true incidence of adverse outcomes.  
6

7  
8 The definition of a surgical adverse event used in this study was “*an unintended and*  
9  
10 *unwanted outcome or state occurring during or following medical care that is so harmful to*  
11  
12 *the patients’ health that it requires (adjustment of) treatment or leads to permanent*  
13  
14 *damage*”, according to the Dutch Society of Surgery.[16] These could include adverse events  
15  
16 due to medical management errors, [17] as defined in the WHO reporting guidelines, but the  
17  
18 recording of events took place before a conclusion regarding its causality (i.e. medical  
19  
20 management error or disease complication) could be given. The definition, its interpretation,  
21  
22 and the method of registration did not change during the study period.  
23  
24  
25

26  
27 Patients without adverse events according to the LHCR were used to check whether  
28  
29 the absence of events was in agreement with the other resources. The patient set with  
30  
31 complications was used to check whether the events as recorded in the LHCR were complete  
32  
33 when compared with the other resources.  
34  
35  
36

### 37 38 **Resources**

39  
40 For each patient included, we retrieved and studied the medical and nursing files, the  
41  
42 discharge letters relevant to that admission period, the documented morning hand-offs, and  
43  
44 the complication database (LHCR). Adverse events entered into the LHCR were derived from  
45  
46 the daily surgical morning hand-offs and the discharge letters. During these hand-offs every  
47  
48 discharged patient was reported. Adverse events documented were those reported by the  
49  
50 surgical residents or attending surgeons.[Goslings] The discharge letters were screened to  
51  
52 find any additional events. The content of the discharge letters used during the study period  
53  
54  
55  
56  
57  
58  
59  
60

1  
2  
3 was predefined in a local protocol, in which the reporting of adverse events that had  
4  
5 occurred during the patient's admission was compulsory.  
6

7  
8 As reference standard for the true number and type of adverse events occurring  
9  
10 during the hospital admission period of each patient we used the combination of all  
11  
12 resources consulted, i.e., LHCR, morning hand-off, discharge letter, medical file and nursing  
13  
14 file. The discharge letter, medical and nursing files were judged separately within the  
15  
16 patient's dossier as they were being kept separately and produced by different caregivers. At  
17  
18 the time of the study, the medical and nursing files were not yet digitalised, but contained  
19  
20 daily reports of the patient's condition and well-being.  
21  
22  
23  
24  
25

### 26 **Study procedure**

27  
28 From each of the resources, except the morning hand-offs, two investigators  
29  
30 independently extracted the documented adverse events that had occurred in the selected  
31  
32 patients and entered these in a database. Any discrepancies were resolved by discussion.  
33  
34  
35

36 The various types of adverse events were first categorized based on the national  
37  
38 classification as used by the Dutch Surgical Society. Because these categories in our sample  
39  
40 were too fragmented, we regrouped the events by similarity (type) and number of  
41  
42 appearance (Table 1). The grading of the severity of each event was based on the  
43  
44 classification of Clavien et al.,[18] and was divided into four classes: 1) temporary health  
45  
46 disadvantage recovering without (re)operation, e.g. wound infection; 2) recovery after  
47  
48 (re)operation, e.g. anastomotic leakage; 3) (probably) permanent damage or function loss,  
49  
50 e.g. stroke; and 4) death during admission. In retrospect, we also categorized recorded  
51  
52 events that had no adverse health effects, e.g. a cancelled operation, as "class 0".  
53  
54  
55  
56  
57  
58  
59  
60



### Data analysis

Data were transferred from the various resources into Excel 2003 (Microsoft Corp. Seattle, WA, USA) for further analysis. Descriptive statistics were expressed as means including standard deviations or medians with interquartile ranges whenever appropriate.

Agreements between the adverse events recorded in the LHCR and in other resources were expressed as percentages. Similarly, we calculated the agreements for each event severity group.

### RESULTS

During 2010, a total of 4196 admissions (of 3252 patients) to the gastro-intestinal, vascular, or trauma surgery wards were recorded. In 705 (16.8%) of these, one or more adverse events were documented in the LHCR. Of the 180 selected admissions, the resources of 135 different patients admitted could be analyzed. Forty-five admissions were excluded because these concerned readmissions of the same patients (n=3) or the data from one of the resources could not be retrieved (n=42). These reasons for exclusion were not likely to be related to the completeness of the adverse events as stated in the various resources. Hence, we considered the remaining set of 135 patients as valid for our purpose.

Of the 135 patients included, 60.7% were male with a mean age of 59.3 years. Median length of stay was 8 days. As shown in Table 2, their characteristics did not differ significantly from the whole group of patients admitted in 2010, except for a significantly longer length of stay and higher number of ASA-2 patients, obviously because we oversampled patients with complications. In 70% of the 135 patients one or more surgical procedures were performed, resulting in a total of 208 procedures in these patients. Based

1  
2  
3 on the summary of all events from all resources, 275 adverse events were recorded in total.  
4  
5 A total of 98 out of 135 patients had suffered one or more adverse events.  
6

7  
8 The proportions of patients with one or more adverse events as recorded in the  
9  
10 different resources as well as in the official LHCR are summarized in Table 3. In 86% of the  
11  
12 cases the LHCR was in agreement with the reference standard as to the total number of  
13  
14 patients with one or more events. In other words, 14% of admissions with adverse events  
15  
16 were not recorded in our official registry. Table 4 shows the severity categorization of the  
17  
18 events as recorded in the various resources. The events missing in the LHCR were all mild  
19  
20 (class 1) events that could be treated with non-surgical interventions, like pain, delirium, or  
21  
22 bladder complications.  
23  
24

25  
26 Adverse events related to medical management errors (“class 0”) occurred rarely but  
27  
28 were poorly registered, particularly in the morning hand-offs and discharge letters. This is  
29  
30 mainly due to the fact that these events mainly concerned “cancelled operations”. Although  
31  
32 these were recorded during the morning hand-offs, they were considered to be of limited  
33  
34 information to include in the discharge letters.  
35  
36

37  
38 The vast majority (80.4%) of the adverse events in the reference standard was  
39  
40 reversible and mild (class 1). The morning hand-offs and discharge letters omitted most of  
41  
42 these events. Only 38% of these mild events were registered in these resources. Also the  
43  
44 LHCR missed most of the mild events, which were best reported in the nursing and medical  
45  
46 files.  
47  
48

49  
50 Surgical complications requiring a re-intervention (class 2) seemed to be under-  
51  
52 recorded in most resources. However, this may be influenced by the fact that in some  
53  
54 patients more than one class-2 event had led to a single re-intervention, but only one of  
55  
56  
57  
58  
59  
60

1  
2  
3 these events was recorded as reason for the re-intervention. Unfortunately, there was no  
4  
5 consensus on how this should have been recorded.  
6

7  
8 The more serious adverse events (classes 3 and 4) occurred less frequently. The  
9  
10 medical and nursing files did not state class-3 events, probably because at that time the  
11  
12 permanent effects of such events could not yet be assessed. Strikingly, even the discharge  
13  
14 letter did not mention many of the events leading to permanent damage or function loss. A  
15  
16 few deaths were not documented in the nursing and medical files because the patient died  
17  
18 on the ICU unit, which was documented in a separate discharge letter not included in this  
19  
20 study.  
21  
22

23  
24 To discover which types of adverse events in particular might be under-recorded, we  
25  
26 investigated which events had a documentation rate of less than 50% as compared with the  
27  
28 reference standard. These were the following: abscess, shock, pressure ulcers, delirium, fluid  
29  
30 collections, pain, pulmonary complications, over-infusion, urinary tract-related  
31  
32 complications, fistulas and vascular complications.  
33  
34  
35  
36  
37

## 38 **DISCUSSION**

39  
40 Registration of surgical adverse events appears valuable, but is largely depending on the  
41  
42 reliability of the underlying sources. In many hospitals a complication registration system,  
43  
44 such as the LHCR in the Netherlands, heavily depends on the accuracy of the reporting and  
45  
46 documentation of adverse events through various resources. The usage of the available  
47  
48 resources might be different in the various Dutch hospitals using the LHCR and is not well  
49  
50 defined.  
51  
52

53  
54 The present study showed that adverse events are under-reported with the LHCR  
55  
56 system but also during the morning report. The less severe events tended to be reported  
57  
58  
59  
60

1  
2  
3 less frequently, except in the nursing file, which was not designed to serve as input for the  
4  
5 LHCR. Nevertheless, all likely resources should be incorporated for an optimum registration  
6  
7 of adverse events. The medical rather than the nursing file seems the most appropriate  
8  
9 additional resource for this purpose.  
10

11  
12 The completeness of the complication registration may also vary with the types of  
13  
14 adverse events a hospital decides to record. Should adverse events with a low severity, for  
15  
16 example such as delay of surgery, be omitted, i.e. a “light” version of complication  
17  
18 registration, a higher accuracy would be achievable. A drawback of this would be that other -  
19  
20 but common – events, such as wound infections or pressure ulcers, are not monitored  
21  
22 properly and cannot be acted upon. Moreover, particularly for relatively minor surgical  
23  
24 interventions, patients will still perceive “mild” adverse events as important and  
25  
26 undesirable.  
27  
28  
29

30  
31 Conversely, registration of all possible adverse events requires more effort to extract  
32  
33 these from the various complementary resources. When pursuing this policy, the nursing file  
34  
35 may be included as an important source of more “mild” events, such as pressure ulcers,  
36  
37 insufficiently controlled pain, or urinary tract infections. Besides, recording the number of  
38  
39 postponed or cancelled surgical interventions can be useful as indicator for a change in the  
40  
41 organization process of care and thereby an improvement of the quality of care.  
42  
43  
44

45  
46 The low number of adverse events included in the discharge letter may be due to  
47  
48 selection of items considered relevant to the general practitioner or follow-up institution.  
49  
50 However, any permanent damage or function loss acquired during admission surely needs  
51  
52 more attention than it appears to receive, based on this study, in particular in the early  
53  
54 phase after discharge and management of the adverse events by the general practitioner. A  
55  
56 predefined format and content of these letters, including for example a computer-generated  
57  
58  
59  
60

1  
2  
3 summary, can improve quality and safety of hand-off communication and subsequent  
4  
5 care.[19]  
6

7  
8 A limitation of this study could be that even the reference standard may have been  
9  
10 an underestimation of the true number of adverse events that had actually occurred. If so,  
11  
12 the various sources leave even more events untracked. However, this does not seem likely,  
13  
14 as all possible sources were studied in retrospect. We did not study the events that might  
15  
16 have occurred (shortly) after discharge, which was beyond the scope of this research.  
17  
18 Secondly, the random sample of admissions investigated may have been relatively small.  
19  
20 Nevertheless, the trends we found are quite conspicuous and seem reliable since two  
21  
22 investigators independently reviewed the resources for events.  
23  
24

25  
26 In conclusion, the registration, management and prevention of surgical adverse  
27  
28 events is serious business. It may also impact the selection of patients to be treated and  
29  
30 procedures to be performed. Therefore, hospitals and clinicians should be willing to put  
31  
32 effort in a structural and reliable means to register not only the beneficial, but also the  
33  
34 harmful effects of their professional activities to improve the quality of care for their  
35  
36 patients.  
37  
38  
39  
40  
41  
42

#### 43 **Acknowledgments**

44  
45 We are greatly indebted to ms. M. van Ieperen, RN, and ms. L. Nauta, RN, for their efforts to  
46  
47 compile adverse event data from the various resources.  
48  
49

50 **Competing interests:** none.

51  
52 **Funding:** No specific grant was received from any funding agency in the public, commercial  
53  
54 or not-for-profit sectors.  
55  
56  
57  
58  
59  
60

## REFERENCES

- 1 Obertop H, Gouma DJ. Complications in surgery - let's face them. *Dig Surg* 2002;**19**:83–85.
- 2 Brennan TA, Leape LL, Laird NM, et al. Harvard Medical Practice Study I. Incidence of adverse events and negligence in hospitalized patients: results of the Harvard Medical Practice Study I. 1991. *Qual Saf Health Care* 2004;**13**(2):145-52.
- 3 Bruce J, Russell EM, Mollison J, et al. The measurement and monitoring of surgical adverse events. *Health Technol Assess* 2001;**5**(22):1-194.
- 4 Vrancken Peeters MP, Vrancken Peeters MJ, Corion LU, et al. Quality control of colorectal surgery with an extensive complication registration system. *Dig Surg* 2005;**22**(3):168-73.
- 5 Kievit J, Krukerink M, Marang-van de Mheen PJ. Surgical adverse outcome reporting as part of routine clinical care. *Qual Saf Health Care* 2010;**19**(6):e20.
- 6 Ghaferi AA, Birkmeyer JD, Dimick JB. Variation in Hospital Mortality Associated with Inpatient Surgery, *New Engl J Med* 2009;**361**:1368-75.
- 7 Gouma DJ, Obertop H. The registration of complications of medical treatment. *Ned Tijdschr Geneesk* 2003;**147**:1252-5.
- 8 Veen EJ, Janssen-Heijnen ML, Leenen LP, et al. The registration of complications in surgery: a learning curve. *World J Surg* 2005;**29**(3):402-9.
- 9 Farley DO, Haviland A, Haas A, et al. How event reporting by US hospitals has changed from 2005 to 2009. *BMJ Qual Saf* 2012;**21**:70-77.
- 10 O'Neil AC, Petersen LA, Cook EF, et al. Physician reporting compared with medical-record review to identify adverse medical events. *Ann Intern Med* 1993;**119**(5):370-6.
- 11 Marang- van de Mheenen PJ, van Hanegem N, Kievit J. Effectiveness of routine reporting to identify minor and serious adverse outcomes in surgical patients. *Qual Saf Health Care* 2005;**14**:378-82.
- 12 Leape LL. Reporting of adverse events. *New Eng J Med* 2002;**347**:1633-8.

- 1  
2  
3 13 Collins ME, Block SD, Arnold RM, et al. On the prospects for a blame-free medical  
4 culture. *Soc Sci Med* 2009;**69(9)**:1287-90.  
5  
6  
7 14 Khatri N, Brown GD, Hicks LL. From a blame culture to a just culture in health care.  
8 *Health Care Manage Rev* 2009;**34(4)**:312-22.  
9  
10  
11 15 Wolff AP, Boermeester M, Janssen I, et al. The national Dutch Institute for Healthcare  
12 Improvement guidelines 'Preoperative trajectory': the essentials. *Ned Tijdschr*  
13 *Geneeskd* 2010;**154**:A2184.  
14  
15  
16 16 Goslings JC, Gouma DJ. What is a surgical complication? *World J Surg* 2008;**32(6)**:952.  
17  
18  
19 17 Hiatt HH, Barnes BA, Brennan TA, et al. A study of medical injury and medical  
20 malpractice. An overview. *New Engl J Med* 1989;**321(7)**:480-484.  
21  
22  
23 18 Clavien PA, Barkun J, de Oliveira ML, et al. The Clavien-Dindo classification of surgical  
24 complications: five-year experience. *Ann Surg* 2009;**250(2)**:187-96.  
25  
26  
27 19 Kripalani S, LeFevre F, Phillips CO, et al. Deficits in communication and information  
28 transfer between hospital-based and primary care physicians: implications for patient  
29 safety and continuity of care. *JAMA* 2007;**297(8)**:831-41.  
30  
31  
32  
33  
34  
35  
36  
37  
38  
39  
40  
41  
42  
43  
44  
45  
46  
47  
48  
49  
50  
51  
52  
53  
54  
55  
56  
57  
58  
59  
60

**Table 1.** Categories used to group the recorded adverse events.

|                                                                                                                                                                                                                                                                         |                                                                                                                                                                                                                                                                                                                                                                                                                                                               |
|-------------------------------------------------------------------------------------------------------------------------------------------------------------------------------------------------------------------------------------------------------------------------|---------------------------------------------------------------------------------------------------------------------------------------------------------------------------------------------------------------------------------------------------------------------------------------------------------------------------------------------------------------------------------------------------------------------------------------------------------------|
| <b>1:</b> Abscess                                                                                                                                                                                                                                                       | <b>13:</b> Fluid collections <ul style="list-style-type: none"> <li>• Seroma</li> </ul>                                                                                                                                                                                                                                                                                                                                                                       |
| <b>2:</b> Surgical procedure cancelled                                                                                                                                                                                                                                  | <b>14:</b> Pain <ul style="list-style-type: none"> <li>• Correction of epidural analgesia</li> </ul>                                                                                                                                                                                                                                                                                                                                                          |
| <b>3:</b> Cardiac complications <ul style="list-style-type: none"> <li>• Atrial or ventricular tachycardia</li> <li>• Brady/tachycardia</li> <li>• Asthma of cardiac origin</li> <li>• Myocardial infarction</li> <li>• Heart failure</li> <li>• Arrhythmias</li> </ul> | <b>15:</b> pulmonary complications <ul style="list-style-type: none"> <li>• Pneumothorax</li> <li>• Respiratory Insufficiency</li> <li>• Atelectasis</li> <li>• Respiratory depression</li> </ul>                                                                                                                                                                                                                                                             |
| <b>4:</b> Pneumonia                                                                                                                                                                                                                                                     | <b>16:</b> Over-infusion                                                                                                                                                                                                                                                                                                                                                                                                                                      |
| <b>5:</b> Bleeding <ul style="list-style-type: none"> <li>• Aneurysm</li> <li>• Hematoma</li> <li>• Dissection</li> </ul>                                                                                                                                               | <b>17:</b> Wound or fascia dehiscence                                                                                                                                                                                                                                                                                                                                                                                                                         |
| <b>6:</b> Shock                                                                                                                                                                                                                                                         | <b>18:</b> Thrombosis                                                                                                                                                                                                                                                                                                                                                                                                                                         |
| <b>7:</b> Anastomotic dehiscence                                                                                                                                                                                                                                        | <b>19:</b> (Wound) Infection <ul style="list-style-type: none"> <li>• Sepsis</li> <li>• Poor wound healing</li> <li>• Wound infection</li> </ul>                                                                                                                                                                                                                                                                                                              |
| <b>8:</b> Miscellaneous leakages <ul style="list-style-type: none"> <li>• Chylus</li> <li>• Gall</li> <li>• Wound</li> </ul>                                                                                                                                            | <b>20:</b> Bladder complications <ul style="list-style-type: none"> <li>• Retention</li> <li>• Urinary tract infection</li> <li>• Urethritis</li> </ul>                                                                                                                                                                                                                                                                                                       |
| <b>9:</b> Pressure ulcer                                                                                                                                                                                                                                                | <b>21:</b> Fistula                                                                                                                                                                                                                                                                                                                                                                                                                                            |
| <b>10:</b> Delirium                                                                                                                                                                                                                                                     | <b>22:</b> Vascular complications <ul style="list-style-type: none"> <li>• Phlebitis</li> <li>• Cellulitis</li> </ul>                                                                                                                                                                                                                                                                                                                                         |
| <b>11:</b> Electrolyte derailment <ul style="list-style-type: none"> <li>• Hemodynamic instability</li> <li>• Anaemia</li> <li>• Hyperglycaemia</li> <li>• INR derailment</li> </ul>                                                                                    | <b>23:</b> Cerebral complications <ul style="list-style-type: none"> <li>• CVA</li> <li>• Infarction</li> <li>• Neuropraxia</li> <li>• Neural compression</li> </ul>                                                                                                                                                                                                                                                                                          |
| <b>12:</b> Gut complications <ul style="list-style-type: none"> <li>• Gastroparesis</li> <li>• Ileus</li> <li>• Derailed stoma output</li> <li>• Ischemia of sigmoid</li> </ul>                                                                                         | <b>24:</b> Other complications <ul style="list-style-type: none"> <li>• Kidney infarction</li> <li>• Allergy</li> <li>• Ascites</li> <li>• Contractures</li> <li>• Disturbed liver function</li> <li>• Paresis</li> <li>• Wrong K-wire</li> <li>• Increased dislocation</li> <li>• Rhabdomyolysis</li> <li>• Addison's crisis</li> <li>• Hernia</li> <li>• Temporary hoarseness</li> <li>• Small intestinal perforation</li> <li>• Shunt occlusion</li> </ul> |



**Table 2.** Patient characteristics in the 135 selected patients vs. all patients admitted in 2010.

| Characteristic                    | Included patients<br>N=135 | Patients admitted in 2010<br>N=3252 |
|-----------------------------------|----------------------------|-------------------------------------|
| Male (%)                          | 82 (60.7%)                 | 1808 (55.6%)                        |
| Age (years):                      |                            |                                     |
| Mean (SD <sup>1</sup> )           | 59.3 (17.0)                | 55.1 (18.0)                         |
| Median (IQR <sup>2</sup> )        | 62.0 (47.5-71.8)           | 57.6 (42.7-68.1)                    |
| Length of stay (days):            |                            |                                     |
| Mean (SD <sup>1</sup> )           | 14.9 (27.6)                | 7.9 (13.9)                          |
| Median (IQR <sup>2</sup> )        | 8.0 (3.0–16.5)             | 4.0 (1.0-9.0)                       |
| Underwent surgery:                | 104 (70%)                  | 2276 (70%)                          |
| General                           | 22.4%                      | 26.2%                               |
| Oesophago-gastro-intestinal       | 34.5%                      | 30.4%                               |
| Hepato-pancreato-biliary          | 14.3%                      | 8.9%                                |
| Trauma                            | 11.3%                      | 20.6%                               |
| Vascular                          | 17.5%                      | 13.9%                               |
| ASA-classification <sup>3</sup> : |                            |                                     |
| 1                                 | 6.8%                       | 24.2%                               |
| 2                                 | 72.7%                      | 45.6%                               |
| 3                                 | 13.6%                      | 26.0%                               |
| 4                                 | 6.8%                       | 3.3%                                |
| 5                                 | 0.0%                       | 1.0%                                |

1: Standard deviation

2: Interquartile range

3: ASA-class at admission of patients who underwent surgery

**Table 3.** Percentage and absolute numbers of patients with one or more adverse event as recorded in each resource, as compared with the reference standard.

| Resource           | Patients with adverse event(s) |
|--------------------|--------------------------------|
| Reference standard | 98 (100%)                      |
| LHCR*              | 84 (86%)                       |
| Morning hand-offs  | 78 (80%)                       |
| Discharge letter   | 76 (78%)                       |
| Medical file       | 76 (78%)                       |
| Nursing file       | 75 (77%)                       |

\*: Dutch national surgical complication registry.

**Table 4.** Percentages and absolute numbers of adverse events as recorded in each resource, categorized per severity class.

| Severity class* | Reference standard | LHCR**           | Morning hand-offs | Discharge letter  | Medical file     | Nursing file     |
|-----------------|--------------------|------------------|-------------------|-------------------|------------------|------------------|
| <b>0</b>        | 100% (11)          | 73% (8)          | 9% (1)            | 18% (2)           | 55% (6)          | 64% (7)          |
| <b>1</b>        | 100% (221)         | 44% (97)         | 32% (71)          | 38% (85)          | 60% (132)        | 67% (148)        |
| <b>2</b>        | 100% (31)          | 81% (25)         | 66% (20)          | 77% (24)          | 68% (21)         | 58% (18)         |
| <b>3</b>        | 100% (9)           | 89% (8)          | 56% (5)           | 22% (2)           | 0% (0)           | 0% (0)           |
| <b>4</b>        | 100% (3)           | 100% (3)         | 100% (3)          | 67% (2)           | 67% (2)          | 33% (1)          |
| <b>Total</b>    | <b>100% (275)</b>  | <b>51% (141)</b> | <b>36% (100)</b>  | <b>42 % (115)</b> | <b>59% (161)</b> | <b>63% (174)</b> |

\*: Severity classes:

- 0: event without adverse effect on health;
- 1: temporary health disadvantage recovering without (re)operation;
- 2: recovery after (re)operation;
- 3: (probably) permanent damage or function loss;
- 4: death.

\*\* : Dutch national surgical complication registry.

1  
2  
3  
4  
5  
6  
7  
8  
9  
10  
11  
12  
13  
14  
15  
16  
17  
18  
19  
20  
21  
22  
23  
24  
25  
26  
27  
28  
29  
30  
31  
32  
33  
34  
35  
36  
37  
38  
39  
40  
41  
42  
43  
44  
45  
46  
47  
48  
49  
50  
51  
52  
53  
54  
55  
56  
57  
58  
59  
60**Results**

|                          |     |                                                                                                                                                                                                              |   |
|--------------------------|-----|--------------------------------------------------------------------------------------------------------------------------------------------------------------------------------------------------------------|---|
| Participants             | 13* | (a) Report numbers of individuals at each stage of study—eg numbers potentially eligible, examined for eligibility, confirmed eligible, included in the study, completing follow-up, and analysed            | ✓ |
|                          |     | (b) Give reasons for non-participation at each stage                                                                                                                                                         | ✓ |
|                          |     | (c) Consider use of a flow diagram                                                                                                                                                                           | ✓ |
| Descriptive data         | 14* | (a) Give characteristics of study participants (eg demographic, clinical, social) and information on exposures and potential confounders                                                                     | ✓ |
|                          |     | (b) Indicate number of participants with missing data for each variable of interest                                                                                                                          | ✓ |
|                          |     | (c) <i>Cohort study</i> —Summarise follow-up time (eg, average and total amount)                                                                                                                             |   |
| Outcome data             | 15* | <i>Cohort study</i> —Report numbers of outcome events or summary measures over time                                                                                                                          |   |
|                          |     | <i>Case-control study</i> —Report numbers in each exposure category, or summary measures of exposure                                                                                                         |   |
|                          |     | <i>Cross-sectional study</i> —Report numbers of outcome events or summary measures                                                                                                                           | ✓ |
| Main results             | 16  | (a) Give unadjusted estimates and, if applicable, confounder-adjusted estimates and their precision (eg, 95% confidence interval). Make clear which confounders were adjusted for and why they were included | ✓ |
|                          |     | (b) Report category boundaries when continuous variables were categorized                                                                                                                                    |   |
|                          |     | (c) If relevant, consider translating estimates of relative risk into absolute risk for a meaningful time period                                                                                             |   |
| Other analyses           | 17  | Report other analyses done—eg analyses of subgroups and interactions, and sensitivity analyses                                                                                                               | ✓ |
| <b>Discussion</b>        |     |                                                                                                                                                                                                              |   |
| Key results              | 18  | Summarise key results with reference to study objectives                                                                                                                                                     | ✓ |
| Limitations              | 19  | Discuss limitations of the study, taking into account sources of potential bias or imprecision. Discuss both direction and magnitude of any potential bias                                                   | ✓ |
| Interpretation           | 20  | Give a cautious overall interpretation of results considering objectives, limitations, multiplicity of analyses, results from similar studies, and other relevant evidence                                   | ✓ |
| Generalisability         | 21  | Discuss the generalisability (external validity) of the study results                                                                                                                                        | ✓ |
| <b>Other information</b> |     |                                                                                                                                                                                                              |   |
| Funding                  | 22  | Give the source of funding and the role of the funders for the present study and, if applicable, for the original study on which the present article is based                                                | ✓ |

\*Give information separately for cases and controls in case-control studies and, if applicable, for exposed and unexposed groups in cohort and cross-sectional studies.

**Note:** An Explanation and Elaboration article discusses each checklist item and gives methodological background and published examples of transparent reporting. The STROBE checklist is best used in conjunction with this article (freely available on the Web sites of PLoS Medicine at <http://www.plosmedicine.org/>, Annals of Internal Medicine at <http://www.annals.org/>, and Epidemiology at <http://www.epidem.com/>). Information on the STROBE Initiative is available at [www.strobe-statement.org](http://www.strobe-statement.org).

## STROBE Statement—checklist of items that should be included in reports of observational studies

|                              | Item No | Recommendation                                                                                                                                                                                                                                                                                                                                                                                                                                                                                                                                                                                                                                                                                   |             |
|------------------------------|---------|--------------------------------------------------------------------------------------------------------------------------------------------------------------------------------------------------------------------------------------------------------------------------------------------------------------------------------------------------------------------------------------------------------------------------------------------------------------------------------------------------------------------------------------------------------------------------------------------------------------------------------------------------------------------------------------------------|-------------|
| <b>Title and abstract</b>    | 1       | (a) Indicate the study's design with a commonly used term in the title or the abstract<br>(b) Provide in the abstract an informative and balanced summary of what was done and what was found                                                                                                                                                                                                                                                                                                                                                                                                                                                                                                    | ✓<br>✓      |
| <b>Introduction</b>          |         |                                                                                                                                                                                                                                                                                                                                                                                                                                                                                                                                                                                                                                                                                                  |             |
| Background/rationale         | 2       | Explain the scientific background and rationale for the investigation being reported                                                                                                                                                                                                                                                                                                                                                                                                                                                                                                                                                                                                             | ✓           |
| Objectives                   | 3       | State specific objectives, including any prespecified hypotheses                                                                                                                                                                                                                                                                                                                                                                                                                                                                                                                                                                                                                                 | ✓           |
| <b>Methods</b>               |         |                                                                                                                                                                                                                                                                                                                                                                                                                                                                                                                                                                                                                                                                                                  |             |
| Study design                 | 4       | Present key elements of study design early in the paper                                                                                                                                                                                                                                                                                                                                                                                                                                                                                                                                                                                                                                          | ✓           |
| Setting                      | 5       | Describe the setting, locations, and relevant dates, including periods of recruitment, exposure, follow-up, and data collection                                                                                                                                                                                                                                                                                                                                                                                                                                                                                                                                                                  | ✓           |
| Participants                 | 6       | (a) <i>Cohort study</i> —Give the eligibility criteria, and the sources and methods of selection of participants. Describe methods of follow-up<br><i>Case-control study</i> —Give the eligibility criteria, and the sources and methods of case ascertainment and control selection. Give the rationale for the choice of cases and controls<br><i>Cross-sectional study</i> —Give the eligibility criteria, and the sources and methods of selection of participants<br>(b) <i>Cohort study</i> —For matched studies, give matching criteria and number of exposed and unexposed<br><i>Case-control study</i> —For matched studies, give matching criteria and the number of controls per case | ✓<br>✓      |
| Variables                    | 7       | Clearly define all outcomes, exposures, predictors, potential confounders, and effect modifiers. Give diagnostic criteria, if applicable                                                                                                                                                                                                                                                                                                                                                                                                                                                                                                                                                         | ✓           |
| Data sources/<br>measurement | 8*      | For each variable of interest, give sources of data and details of methods of assessment (measurement). Describe comparability of assessment methods if there is more than one group                                                                                                                                                                                                                                                                                                                                                                                                                                                                                                             | ✓           |
| Bias                         | 9       | Describe any efforts to address potential sources of bias                                                                                                                                                                                                                                                                                                                                                                                                                                                                                                                                                                                                                                        | ✓           |
| Study size                   | 10      | Explain how the study size was arrived at                                                                                                                                                                                                                                                                                                                                                                                                                                                                                                                                                                                                                                                        | ✓           |
| Quantitative variables       | 11      | Explain how quantitative variables were handled in the analyses. If applicable, describe which groupings were chosen and why                                                                                                                                                                                                                                                                                                                                                                                                                                                                                                                                                                     | ✓           |
| Statistical methods          | 12      | (a) Describe all statistical methods, including those used to control for confounding<br>(b) Describe any methods used to examine subgroups and interactions<br>(c) Explain how missing data were addressed<br>(d) <i>Cohort study</i> —If applicable, explain how loss to follow-up was addressed<br><i>Case-control study</i> —If applicable, explain how matching of cases and controls was addressed<br><i>Cross-sectional study</i> —If applicable, describe analytical methods taking account of sampling strategy<br>(e) Describe any sensitivity analyses                                                                                                                                | ✓<br>✓<br>✓ |

Continued on next page





**Registration of surgical adverse outcomes: A reliability study in a university hospital**

|                                 |                                                                                                                                                                                                                                                                                                                                                |
|---------------------------------|------------------------------------------------------------------------------------------------------------------------------------------------------------------------------------------------------------------------------------------------------------------------------------------------------------------------------------------------|
| Journal:                        | <i>BMJ Open</i>                                                                                                                                                                                                                                                                                                                                |
| Manuscript ID:                  | bmjopen-2012-000891.R1                                                                                                                                                                                                                                                                                                                         |
| Article Type:                   | Research                                                                                                                                                                                                                                                                                                                                       |
| Date Submitted by the Author:   | 05-Mar-2012                                                                                                                                                                                                                                                                                                                                    |
| Complete List of Authors:       | Ubbink, Dirk; Academic Medical Center, Quality Assurance & Process Innovation<br>Visser, Annelies; Academic Medical Center Amsterdam, Department of Surgery<br>Gouma, Dirk; Academic Medical Center, University of Amsterdam, Department of Surgery<br>Goslings, J.C.; Academic Medical Center, University of Amsterdam, Department of Surgery |
| <b>Primary Subject Heading</b>: | Surgery                                                                                                                                                                                                                                                                                                                                        |
| Secondary Subject Heading:      | Health services research                                                                                                                                                                                                                                                                                                                       |
| Keywords:                       | SURGERY, HEALTH SERVICES ADMINISTRATION & MANAGEMENT, Quality in health care < HEALTH SERVICES ADMINISTRATION & MANAGEMENT, Health & safety < HEALTH SERVICES ADMINISTRATION & MANAGEMENT, Clinical audit < HEALTH SERVICES ADMINISTRATION & MANAGEMENT                                                                                        |
|                                 |                                                                                                                                                                                                                                                                                                                                                |

SCHOLARONE™  
Manuscripts

only

1  
2  
3  
4  
5  
6  
7  
8  
9  
10  
11  
12  
13  
14  
15  
16  
17  
18  
19  
20  
21  
22  
23  
24  
25  
26  
27  
28  
29  
30  
31  
32  
33  
34  
35  
36  
37  
38  
39  
40  
41  
42  
43  
44  
45  
46  
47  
48  
49  
50  
51  
52  
53  
54  
55  
56  
57  
58  
59  
60**Results**

|                  |     |                                                                                                                                                                                                              |   |
|------------------|-----|--------------------------------------------------------------------------------------------------------------------------------------------------------------------------------------------------------------|---|
| Participants     | 13* | (a) Report numbers of individuals at each stage of study—eg numbers potentially eligible, examined for eligibility, confirmed eligible, included in the study, completing follow-up, and analysed            | ✓ |
|                  |     | (b) Give reasons for non-participation at each stage                                                                                                                                                         | ✓ |
|                  |     | (c) Consider use of a flow diagram                                                                                                                                                                           | ✓ |
| Descriptive data | 14* | (a) Give characteristics of study participants (eg demographic, clinical, social) and information on exposures and potential confounders                                                                     | ✓ |
|                  |     | (b) Indicate number of participants with missing data for each variable of interest                                                                                                                          | ✓ |
|                  |     | (c) <i>Cohort study</i> —Summarise follow-up time (eg, average and total amount)                                                                                                                             |   |
| Outcome data     | 15* | <i>Cohort study</i> —Report numbers of outcome events or summary measures over time                                                                                                                          |   |
|                  |     | <i>Case-control study</i> —Report numbers in each exposure category, or summary measures of exposure                                                                                                         |   |
|                  |     | <i>Cross-sectional study</i> —Report numbers of outcome events or summary measures                                                                                                                           | ✓ |
| Main results     | 16  | (a) Give unadjusted estimates and, if applicable, confounder-adjusted estimates and their precision (eg, 95% confidence interval). Make clear which confounders were adjusted for and why they were included | ✓ |
|                  |     | (b) Report category boundaries when continuous variables were categorized                                                                                                                                    |   |
|                  |     | (c) If relevant, consider translating estimates of relative risk into absolute risk for a meaningful time period                                                                                             |   |
| Other analyses   | 17  | Report other analyses done—eg analyses of subgroups and interactions, and sensitivity analyses                                                                                                               | ✓ |

**Discussion**

|                  |    |                                                                                                                                                                            |   |
|------------------|----|----------------------------------------------------------------------------------------------------------------------------------------------------------------------------|---|
| Key results      | 18 | Summarise key results with reference to study objectives                                                                                                                   | ✓ |
| Limitations      | 19 | Discuss limitations of the study, taking into account sources of potential bias or imprecision. Discuss both direction and magnitude of any potential bias                 | ✓ |
| Interpretation   | 20 | Give a cautious overall interpretation of results considering objectives, limitations, multiplicity of analyses, results from similar studies, and other relevant evidence | ✓ |
| Generalisability | 21 | Discuss the generalisability (external validity) of the study results                                                                                                      | ✓ |

**Other information**

|         |    |                                                                                                                                                               |   |
|---------|----|---------------------------------------------------------------------------------------------------------------------------------------------------------------|---|
| Funding | 22 | Give the source of funding and the role of the funders for the present study and, if applicable, for the original study on which the present article is based | ✓ |
|---------|----|---------------------------------------------------------------------------------------------------------------------------------------------------------------|---|

\*Give information separately for cases and controls in case-control studies and, if applicable, for exposed and unexposed groups in cohort and cross-sectional studies.

**Note:** An Explanation and Elaboration article discusses each checklist item and gives methodological background and published examples of transparent reporting. The STROBE checklist is best used in conjunction with this article (freely available on the Web sites of PLoS Medicine at <http://www.plosmedicine.org/>, Annals of Internal Medicine at <http://www.annals.org/>, and Epidemiology at <http://www.epidem.com/>). Information on the STROBE Initiative is available at [www.strobe-statement.org](http://www.strobe-statement.org).

## STROBE Statement—checklist of items that should be included in reports of observational studies

|                              | Item No | Recommendation                                                                                                                                                                                                                                                                                                                                                                                                                                                                                                                                                                                                                                                                                   |             |
|------------------------------|---------|--------------------------------------------------------------------------------------------------------------------------------------------------------------------------------------------------------------------------------------------------------------------------------------------------------------------------------------------------------------------------------------------------------------------------------------------------------------------------------------------------------------------------------------------------------------------------------------------------------------------------------------------------------------------------------------------------|-------------|
| <b>Title and abstract</b>    | 1       | (a) Indicate the study's design with a commonly used term in the title or the abstract<br>(b) Provide in the abstract an informative and balanced summary of what was done and what was found                                                                                                                                                                                                                                                                                                                                                                                                                                                                                                    | ✓<br>✓      |
| <b>Introduction</b>          |         |                                                                                                                                                                                                                                                                                                                                                                                                                                                                                                                                                                                                                                                                                                  |             |
| Background/rationale         | 2       | Explain the scientific background and rationale for the investigation being reported                                                                                                                                                                                                                                                                                                                                                                                                                                                                                                                                                                                                             | ✓           |
| Objectives                   | 3       | State specific objectives, including any prespecified hypotheses                                                                                                                                                                                                                                                                                                                                                                                                                                                                                                                                                                                                                                 | ✓           |
| <b>Methods</b>               |         |                                                                                                                                                                                                                                                                                                                                                                                                                                                                                                                                                                                                                                                                                                  |             |
| Study design                 | 4       | Present key elements of study design early in the paper                                                                                                                                                                                                                                                                                                                                                                                                                                                                                                                                                                                                                                          | ✓           |
| Setting                      | 5       | Describe the setting, locations, and relevant dates, including periods of recruitment, exposure, follow-up, and data collection                                                                                                                                                                                                                                                                                                                                                                                                                                                                                                                                                                  | ✓           |
| Participants                 | 6       | (a) <i>Cohort study</i> —Give the eligibility criteria, and the sources and methods of selection of participants. Describe methods of follow-up<br><i>Case-control study</i> —Give the eligibility criteria, and the sources and methods of case ascertainment and control selection. Give the rationale for the choice of cases and controls<br><i>Cross-sectional study</i> —Give the eligibility criteria, and the sources and methods of selection of participants<br>(b) <i>Cohort study</i> —For matched studies, give matching criteria and number of exposed and unexposed<br><i>Case-control study</i> —For matched studies, give matching criteria and the number of controls per case | ✓<br>✓      |
| Variables                    | 7       | Clearly define all outcomes, exposures, predictors, potential confounders, and effect modifiers. Give diagnostic criteria, if applicable                                                                                                                                                                                                                                                                                                                                                                                                                                                                                                                                                         | ✓           |
| Data sources/<br>measurement | 8*      | For each variable of interest, give sources of data and details of methods of assessment (measurement). Describe comparability of assessment methods if there is more than one group                                                                                                                                                                                                                                                                                                                                                                                                                                                                                                             | ✓           |
| Bias                         | 9       | Describe any efforts to address potential sources of bias                                                                                                                                                                                                                                                                                                                                                                                                                                                                                                                                                                                                                                        | ✓           |
| Study size                   | 10      | Explain how the study size was arrived at                                                                                                                                                                                                                                                                                                                                                                                                                                                                                                                                                                                                                                                        | ✓           |
| Quantitative variables       | 11      | Explain how quantitative variables were handled in the analyses. If applicable, describe which groupings were chosen and why                                                                                                                                                                                                                                                                                                                                                                                                                                                                                                                                                                     | ✓           |
| Statistical methods          | 12      | (a) Describe all statistical methods, including those used to control for confounding<br>(b) Describe any methods used to examine subgroups and interactions<br>(c) Explain how missing data were addressed<br>(d) <i>Cohort study</i> —If applicable, explain how loss to follow-up was addressed<br><i>Case-control study</i> —If applicable, explain how matching of cases and controls was addressed<br><i>Cross-sectional study</i> —If applicable, describe analytical methods taking account of sampling strategy<br>(e) Describe any sensitivity analyses                                                                                                                                | ✓<br>✓<br>✓ |

Continued on next page
